# Supplementary material
Source: Springer Nature journal article supplement (https://www.springermedizin.de/resource/supplementary/13002_2005_9_MOESM1_ESM.pdf/9626784)
Supplement: MOESM1 [file 9626784]

Plants used in the community of “Três Ladeiras” in the municipality of Igarassu (Pernambuco, Northeast Brazil): indications and Use Value. C= cultivated. NC= non-cultivated.

| Botanical family and taxon                  | name(s) recorded | Claimed medical use                           | Part(s) used                | Use Value | Status |
|---------------------------------------------|------------------|-----------------------------------------------|-----------------------------|-----------|--------|
| <b>Acanthaceae</b>                          |                  |                                               |                             |           |        |
| <i>Justicia pectoralis</i> Jacq.            | Chambá           | Cough                                         | Whole Plant                 | 0.33      | C      |
| <i>Graptophyllum pictum</i> Griff.          | Meracilina       | Rash, cicatrizing                             | Leaves                      | 0.67      | C      |
| <b>Amaranthaceae</b>                        |                  |                                               |                             |           |        |
| <i>Pfaffia glomerata</i> (Spreng.) Pederson | Acônito          | Fever                                         | Leaves                      | 0.67      | C      |
| <b>Anacardiaceae</b>                        |                  |                                               |                             |           |        |
| <i>Anacardium occidentale</i> L.            | Caju Roxo        | Anti-inflammation, inflammation of the uterus | Bark of the stem            | 0.33      | C      |
| <i>Mangifera indica</i> L.                  | Manga Espada     | Cough, anti-inflammation, fever               | Leaves                      | 0.83      | C      |
| <i>Schinus terebinthifolius</i> Raddi.      | Aroeira          | Anti-inflammation, cicatrizing                | Bark of the stem and Leaves | 1.17      | C      |
| <b>Annonaceae</b>                           |                  |                                               |                             |           |        |
| <i>Annona marcgravii</i> Mart.              | Aticum           | Sinusitis, tiredness, fever, expectoration    | Leaves                      | 0.83      | NC     |
| <b>Apiaceae</b>                             |                  |                                               |                             |           |        |
| <i>Pimpinella anisum</i> L.                 | Erva doce        | Dysentery, digestive                          | Seed and Leaves             | 0.33      | C      |
| <b>Apocynaceae</b>                          |                  |                                               |                             |           |        |
| <i>Hancornia speciosa</i> Gomez             | Mangaba          | Pain in the testicle                          | Latex                       | 0.17      | C      |
| <b>Arecaceae</b>                            |                  |                                               |                             |           |        |
| <i>Acrocomia intumescens</i> Drude          | Macaíba          | Cough                                         | Leaves                      | 0.17      | NC     |
| <i>Cocos nucifera</i> L.                    | Coco Verde       | Dysentery                                     | Pericarp of the fruit       | 0.17      | C      |

|                                           |                   |                                       |                                    |      |    |
|-------------------------------------------|-------------------|---------------------------------------|------------------------------------|------|----|
| <i>Cocos nucifera</i> L.                  | Coco Vermelho     | Hepatitis, problem of the kidney,     | Liquid endosperm, Bark of the stem | 0.50 | C  |
| <i>Elaeis guineensis</i> L.               | Dendê             | Boil                                  | Oil                                | 0.17 | C  |
| <i>Syagrus</i> sp.                        | Coco Catolé       | Liver diseases, problem of the kidney | Root                               | 0.50 | NC |
| <b>Asteraceae</b>                         |                   |                                       |                                    |      |    |
| <i>Acanthospermum hispidum</i> DC.        | Espinho de Cigano | Cough, dysentery                      | Root                               | 0.67 | NC |
| <i>Coniza bonariensis</i> (L.) Cronq.     | Rabo de Raposa    | Fungi                                 | Leaves                             | 0.33 | NC |
| <i>Egletes viscosa</i> (L.) Less.         | Macela            | Swelling                              | Leaves                             | 0.17 | NC |
| <i>Helianthus annuus</i> L.               | Girassol          | Spill                                 | Seed                               | 0.17 | C  |
| <i>Tagetes</i> sp.                        | Cravo de Defunto  | Cough                                 | Flower                             | 0.17 | C  |
| <i>Vernonia condensata</i> Baker          | Alcachofra        | Dysentery, liver diseases             | Leaves                             | 0.33 | C  |
| <b>Begoniaceae</b>                        |                   |                                       |                                    |      |    |
| <i>Begonia vitifolia</i> Schott.          | Capeba            | Digestive                             | Leaves                             | 0.17 | C  |
| <b>Bignoniaceae</b>                       |                   |                                       |                                    |      |    |
| <i>Tabebuia avellaneda</i> Lor. et Gris   | Pau D'arco Roxo   | Rheumatic, cancer, column, spleen     | Bark of the stem                   | 0.67 | NC |
| <b>Boraginaceae</b>                       |                   |                                       |                                    |      |    |
| <i>Heliotropium indicum</i> L.            | Fedegoso          | Derrame, digestive, spleen            | Leaves e Root                      | 0.50 | NC |
| <b>Brassicaceae</b>                       |                   |                                       |                                    |      |    |
| <i>Nasturtium officinale</i> R. Br.       | Agrião            | Cough, problem of the kidney, flu     | Whole Plant                        | 0.83 | NC |
| <b>Bromeliaceae</b>                       |                   |                                       |                                    |      |    |
| <i>Tilandsia usneoides</i> L.             | Salambaia         | Gastritis                             | Whole Plant                        | 0.17 | C  |
| <b>Burseraceae</b>                        |                   |                                       |                                    |      |    |
| <i>Protium heptaphyllum</i> (Aubl.) March | Amescla           | Headache,pain of tooth, flu,rheumatic | Resin                              | 1.00 | NC |

**Caricaceae**

|                         |       |       |       |      |   |
|-------------------------|-------|-------|-------|------|---|
| <i>Carica papaya</i> L. | Mamão | Cough | Fruit | 0.33 | C |
|-------------------------|-------|-------|-------|------|---|

**Caesalpinaceae**

|                                                    |            |                                       |                            |      |    |
|----------------------------------------------------|------------|---------------------------------------|----------------------------|------|----|
| <i>Caesalpinia ferrea</i> Mart. Ex Tul.            | Jucá       | Rheumatic, cicatrizing Bruise         | Fruit and Bark of the stem | 0.50 | NC |
| <i>Hymenaea martiana</i> Hayne                     | Jatobá     | Bruise, anti-inflammation , rheumatic | Bark of the stem and Seed  | 1.33 | NC |
| <i>Senna occidentalis</i> (L.) (Link)              | Manjerioba | Cough                                 | Flower and Root            | 0.17 | NC |
| <i>Tamarindus indica</i> L.                        | Tamarindo  | Problem of the kidney                 | Bark of the stem           | 0.17 | C  |
| Not identified                                     | Pau D'óleo | Boil                                  | Oil                        | 0.17 | ?  |
| <i>Senna obtusifolia</i> (L.) H.S. Irwin & Barnbey | Mata Pasto | Cough                                 | Root and Leaves            | 0.17 | NC |

**Cecropiaceae**

|                               |                |                                               |      |      |    |
|-------------------------------|----------------|-----------------------------------------------|------|------|----|
| <i>Cecropia palmata</i> Willd | Imbaúba Branca | Anti-inflammation, inflammation of the uterus | Root | 0.33 | NC |
|-------------------------------|----------------|-----------------------------------------------|------|------|----|

**Capparaceae**

|                             |         |       |        |      |    |
|-----------------------------|---------|-------|--------|------|----|
| <i>Cleome spinosa</i> Jacq. | Muçambê | Cough | Flower | 0.17 | NC |
|-----------------------------|---------|-------|--------|------|----|

**Caprifoliaceae**

|                                            |                |                |        |      |   |
|--------------------------------------------|----------------|----------------|--------|------|---|
| <i>Sambucus australis</i> Cham. & Schlecht | Flor de Sabugo | Cough, measles | Flower | 0.50 | C |
|--------------------------------------------|----------------|----------------|--------|------|---|

**Chenopodiaceae**

|                                    |         |                       |        |      |   |
|------------------------------------|---------|-----------------------|--------|------|---|
| <i>Chenopodium ambrosioides</i> L. | Mastruz | Cough, illness, worm, | Leaves | 0.67 | C |
|------------------------------------|---------|-----------------------|--------|------|---|

**Clusiaceae**

|                                          |         |           |        |      |    |
|------------------------------------------|---------|-----------|--------|------|----|
| <i>Vismia guianensis</i> (Aubl.) Choisy. | Lacre   | Itch      | Leaves | 0.33 | NC |
| <i>Symphonia</i> sp.                     | Bulandi | Dysentery | Leaves | 0.17 | NC |

**Convolvulaceae**

|                                             |                 |            |                 |      |         |
|---------------------------------------------|-----------------|------------|-----------------|------|---------|
| <i>Ipomoea asarifolia</i> (Ders.) R. et Sch | Salsa           | Itch       | Flower and Root | 0.17 | NC      |
| <i>Operculina alata</i> (Ham.) Urb.         | Batata de Pulga | Fever, flu | Root            | 0.50 | NC<br>? |
| Not identified                              | Acanfor         | Cough      | Root            | 0.33 |         |

**Costaceae**

|                   |                |          |      |      |   |
|-------------------|----------------|----------|------|------|---|
| <i>Costus</i> sp. | Cana de Macaco | Diabetes | Root | 0.17 | C |
|-------------------|----------------|----------|------|------|---|

**Curcubitaceae**

|                                  |           |           |                |      |    |
|----------------------------------|-----------|-----------|----------------|------|----|
| <i>Luffa operculata</i> Cong.    | Cabacinho | Rheumatic | Fruit and Seed | 0.17 | NC |
| <i>Sechium edule</i> (Jacq.) Sw. | Chuchu    | Cough     | Fruit          | 0.17 | C  |

**Euphorbiaceae**

|                                       |                  |                                  |                  |      |    |
|---------------------------------------|------------------|----------------------------------|------------------|------|----|
| <i>Croton</i> sp.                     | Marmeleiro       | Renal problems                   | Bark of the stem | 0.17 | NC |
| <i>Cnidioscolus urens</i> (L.) Arthur | Urtiga Branca    | Anti-inflammation, cough         | Root             | 0.50 | NC |
| <i>Euphorbia thymifolia</i> L.        | Rins/Pé de Pombo | Problem of the kidney, Dysentery | Whole Plant      | 0.67 | NC |
| <i>Phyllanthus niruri</i> L.          | Quebra-pedra     | Problem of the kidney            | Root             | 0.17 | NC |

**Fabaceae**

|                                     |                 |                                               |                           |      |    |
|-------------------------------------|-----------------|-----------------------------------------------|---------------------------|------|----|
| <i>Bowdichia virgilioides</i> Kunth | Sucupira Branca | Anti-inflammation, inflammation of the uterus | Bark of the stem and Root | 0.50 | NC |
| <i>Zornia diphylla</i> (L.) Pers.   | Urinana         |                                               | Whole plant               | 0.17 | NC |

**Iridaceae**

|                   |         |        |       |      |   |
|-------------------|---------|--------|-------|------|---|
| <i>Crocus</i> sp. | Açafrão | Bruise | Fruit | 0.33 | C |
|-------------------|---------|--------|-------|------|---|

**Lamiaceae**

|                                               |        |                             |        |      |   |
|-----------------------------------------------|--------|-----------------------------|--------|------|---|
| <i>Aeolanthus suaveolens</i> Mart. ex Spreng. | Macaçá | Pain, pain of ear, headache | Leaves | 1.33 | C |
| <i>Mentha pulegium</i> L.                     | Vick   | Cough                       | Leaves | 0.17 | C |

|                                                   |                     |                                                  |                            |      |    |
|---------------------------------------------------|---------------------|--------------------------------------------------|----------------------------|------|----|
| <i>Mentha sp.</i>                                 | Hortelã Miúdo       | Colic, worm, faint, cough,                       | Leaves                     | 0.83 | C  |
| <i>Ocimum basilicum</i> L.                        | Manjeriçã           | Sight                                            | Leaves                     | 0.50 | C  |
| <i>Ocimum gratissimum</i> L.                      | Alfavaca deCaboclo  | Sinusitis                                        | Leaves                     | 0.17 | C  |
| <i>Ocimum gratissimum</i> L.                      | Louro/Alfavaca      | Cough                                            | Leaves                     | 0.17 | C  |
| <i>Ocimum minimum</i> L.                          | Manjeriçã Miúdo     | Bruise                                           | Leaves                     | 0.17 | C  |
| <i>Plectranthus barbatus</i> Andr.                | Boldo               | Dysentery                                        | Leaves                     | 0.17 | C  |
| <i>Plectranthus sp.</i>                           | Hortelã do Maranhão | Headache, colic, pain in the articulation        | Leaves                     | 0.50 | C  |
| <i>Plectranthus sp.</i>                           | Hortelã Bahia       | Cough, pain of ear                               | Leaves                     | 0.83 | C  |
| <i>Rosmarinus officinalis</i> L.                  | Alecrim             | Pain                                             | Leaves                     | 0.17 |    |
| Not identified                                    | Hortelã Pastilha    | Cough, pain                                      | Whole Plant and Leaves     | 0.50 | ?  |
| Not identified                                    | Verga Morta         | Pain                                             | Whole Plant and Leaves     | 0.50 | ?  |
| <b>Lauraceae</b>                                  |                     |                                                  |                            |      |    |
| <i>Persea americana</i> Mill.                     | Abacate             | Dysentery, problem of the kidney, liver diseases | Leaves                     | 0.83 | C  |
| <b>Lecythidaceae</b>                              |                     |                                                  |                            |      |    |
| <i>Eschweilera ovata</i> (Cambess.) Miers         | Embiriba            | Cicatrizing                                      | Bark of the stem           | 0.33 | NC |
| <b>Mimosaceae</b>                                 |                     |                                                  |                            |      |    |
| <i>Pithecellobium cochliocarpum</i> (Gomez) Macbr | Barbatenon          | Cicatrizing, illness, inflammation of the uterus | Bark of the stem and Latex | 1.83 | NC |
| <b>Liliaceae</b>                                  |                     |                                                  |                            |      |    |
| <i>Allium aescalonicum</i> L.                     | Cebola Branca       | Cough, pain, digestive                           | Bulb                       | 0.67 | C  |
| <i>Allium sativum</i> L.                          | Alho                | Derrame, cough                                   | Bulb                       | 0.33 | C  |
| <i>Aloe vera</i> (L.) Burm.                       | Babosa              | Gastritis, boil, anti-inflammation               | Leaves                     | 0.83 | C  |
| <i>Eleutherine plicata</i> Herb.                  | Alho do Mato        | Cough, flu                                       | Bulb                       | 0.67 | C  |

**Loranthaceae**

|                                            |                       |                                   |             |      |    |
|--------------------------------------------|-----------------------|-----------------------------------|-------------|------|----|
| <i>Phthirusa pyrifolia</i> (H.B.K.) Eichl. | Estanca Sangue        | Anti-inflammation, pain of tooth, | Leaves      | 0.33 | NC |
| <i>Phthirusa pyrifolia</i> (H.B.K.) Eichl. | Esterco de Passarinho | Pain of tooth                     | Whole Plant | 0.50 | NC |

**Malvaceae**

|                        |                 |                                 |             |      |    |
|------------------------|-----------------|---------------------------------|-------------|------|----|
| <i>Gossypium sp.</i>   | Algodão Crioulo | Headache, pain of neck swelling | Leaves      | 0.50 | C  |
| <i>Malva sp.</i>       | Malva Branca    | Swelling                        | Whole Plant | 0.17 | NC |
| <i>Urena lobata</i> L. | Malva Rosa      | Fever, expectoration,           | Leaves      | 0.33 | NC |

**Melastomataceae**

|                |             |                |                 |      |   |
|----------------|-------------|----------------|-----------------|------|---|
| Not identified | Tonga-tonga | Pain of tooth, | Seed and Leaves | 0.17 | ? |
|----------------|-------------|----------------|-----------------|------|---|

**Moraceae**

|                      |                    |                                  |      |      |    |
|----------------------|--------------------|----------------------------------|------|------|----|
| <i>Dorstenia sp.</i> | Batata Contra Erva | Cough, expectoration, bronquitis | Root | 0.83 | NC |
|----------------------|--------------------|----------------------------------|------|------|----|

**Musaceae**

|                            |              |       |        |      |   |
|----------------------------|--------------|-------|--------|------|---|
| <i>Musa paradisiaca</i> L. | Banana-prata | Cough | Flower | 0.33 | C |
|----------------------------|--------------|-------|--------|------|---|

**Myristicaceae**

|                |         |                 |      |      |   |
|----------------|---------|-----------------|------|------|---|
| Not identified | Urucuba | Pain, dysentery | Seed | 0.50 | ? |
|----------------|---------|-----------------|------|------|---|

**Myrtaceae**

|                                      |               |                  |                            |      |   |
|--------------------------------------|---------------|------------------|----------------------------|------|---|
| <i>Eucalyptus citriodora</i> Hook    | Eucalipto     | Fever            | Leaves                     | 0.17 | C |
| <i>Eugenia uniflora</i> L.           | Pitanga       | Dysentery        | Leaves                     | 0.17 | C |
| <i>Psidium cattleianum</i> Sabine    | Araçá         | Dysentery        | Leaves                     | 0.17 | C |
| <i>Psidium guajava</i> Raddi         | Goiaba        | Dysentery        | Leaves                     | 0.17 | C |
| <i>Syzygium jambolanum</i> (Lam.) DC | Azeitona Roxa | Diabetes         | Bark of the stem           | 0.17 | C |
| Not identified                       | Joboticaba    | Sight, digestive | Bark of the stem and Fruit | 0.33 | ? |

**Nyctaginaceae**

|                              |            |                          |      |      |    |
|------------------------------|------------|--------------------------|------|------|----|
| <i>Boerhaavia diffusa</i> L. | Pega-pinto | Anti-inflammation, Cough | Root | 1.17 | NC |
|------------------------------|------------|--------------------------|------|------|----|

**Olacaceae**

|                             |        |      |                             |      |    |
|-----------------------------|--------|------|-----------------------------|------|----|
| <i>Ximenia americana</i> L. | Ameixa | Rash | Bark of the stem and Leaves | 0.17 | NC |
|-----------------------------|--------|------|-----------------------------|------|----|

**Oxalidaceae**

|                              |           |                       |                  |      |   |
|------------------------------|-----------|-----------------------|------------------|------|---|
| <i>Averrhoa carambola</i> L. | Carambola | Problem of the kidney | Leaves and Fruit | 0.83 | C |
|------------------------------|-----------|-----------------------|------------------|------|---|

**Papaveraceae**

|                             |             |       |                      |      |   |
|-----------------------------|-------------|-------|----------------------|------|---|
| <i>Argemone mexicana</i> L. | Cardo Santo | Spill | Whole Plant and Seed | 0.50 | N |
|-----------------------------|-------------|-------|----------------------|------|---|

**Passifloraceae**

|                                |          |          |                  |      |   |
|--------------------------------|----------|----------|------------------|------|---|
| <i>Passiflora edulis</i> Sims. | Maracujá | Diabetes | Bark of the stem | 0.17 | C |
|--------------------------------|----------|----------|------------------|------|---|

**Pedaliaceae**

|                             |                |       |             |      |   |
|-----------------------------|----------------|-------|-------------|------|---|
| <i>Sesamum orientale</i> L. | Gergelim Preto | Spill | Whole Plant | 0.17 | C |
|-----------------------------|----------------|-------|-------------|------|---|

**Phytolaccaceae**

|                              |        |                           |                 |      |   |
|------------------------------|--------|---------------------------|-----------------|------|---|
| <i>Petiveria alliacea</i> L. | Atipim | Swelling, rheumatic, pain | Leaves and Root | 0.67 | C |
|------------------------------|--------|---------------------------|-----------------|------|---|

**Poaceae**

|                                         |                 |                                               |      |      |   |
|-----------------------------------------|-----------------|-----------------------------------------------|------|------|---|
| <i>Brachiaria mutica</i> (Forsk.) Stapf | Capim de Planta | Anti-inflammation, inflammation of the uterus | Root | 0.33 | C |
|-----------------------------------------|-----------------|-----------------------------------------------|------|------|---|

|                                        |             |                          |                 |      |   |
|----------------------------------------|-------------|--------------------------|-----------------|------|---|
| <i>Cymbopogon citratus</i> (DC.) Stapf | Capim Santo | Dysentery, tranquillizer | Leaves and Root | 0.50 | C |
|----------------------------------------|-------------|--------------------------|-----------------|------|---|

|                                      |       |        |      |      |   |
|--------------------------------------|-------|--------|------|------|---|
| <i>Dendrocalamus giganteus</i> Munro | Bambu | Column | Root | 0.17 | C |
|--------------------------------------|-------|--------|------|------|---|

|                                |         |           |      |      |   |
|--------------------------------|---------|-----------|------|------|---|
| <i>Phalaris canariensis</i> L. | Alpiste | Hepatitis | Seed | 0.17 | C |
|--------------------------------|---------|-----------|------|------|---|

|                                 |      |          |        |      |   |
|---------------------------------|------|----------|--------|------|---|
| <i>Saccharum officinarum</i> L. | Cana | Diabetes | Leaves | 0.17 | C |
|---------------------------------|------|----------|--------|------|---|

**Rhamnaceae**

|                                |     |                       |                  |      |    |
|--------------------------------|-----|-----------------------|------------------|------|----|
| <i>Ziziphus joazeiro</i> Mart. | Juá | Cough, illness, louse | Bark of the stem | 0.83 | NC |
|--------------------------------|-----|-----------------------|------------------|------|----|

**Rhizophoraceae**

|                             |        |                                               |        |      |    |
|-----------------------------|--------|-----------------------------------------------|--------|------|----|
| <i>Rhizophora mangle</i> L. | Mangue | Anti-inflammation, inflammation of the uterus | Flower | 0.33 | NC |
|-----------------------------|--------|-----------------------------------------------|--------|------|----|

**Rosaceae**

|                 |      |              |        |      |   |
|-----------------|------|--------------|--------|------|---|
| <i>Rosa</i> sp. | Rosa | Heart, cough | Flower | 0.33 | C |
|-----------------|------|--------------|--------|------|---|

**Rubiaceae**

|                                          |                   |                              |             |      |    |
|------------------------------------------|-------------------|------------------------------|-------------|------|----|
| <i>Borreria verticillata</i> (L.) G. Mey | Vassoura de Botão | Dysentery, anti-inflammation | Whole Plant | 1.17 | NC |
|------------------------------------------|-------------------|------------------------------|-------------|------|----|

|                                               |           |                    |      |      |    |
|-----------------------------------------------|-----------|--------------------|------|------|----|
| <i>Cephaelis ipecacuanha</i> (Brot.) A. Rich. | Papeconha | Rash, sight, cough | Root | 0.50 | NC |
|-----------------------------------------------|-----------|--------------------|------|------|----|

**Rutaceae**

|                                    |         |                     |                   |      |   |
|------------------------------------|---------|---------------------|-------------------|------|---|
| <i>Citrus sinensis</i> (L.) Osbeck | Laranja | Insomnia, dysentery | Flower and Leaves | 0.83 | C |
|------------------------------------|---------|---------------------|-------------------|------|---|

|                       |           |                           |                 |      |    |
|-----------------------|-----------|---------------------------|-----------------|------|----|
| <i>Pilocarpus</i> sp. | Jaborandi | Dysentery, pain of tooth, | Leaves and Root | 0.33 | NC |
|-----------------------|-----------|---------------------------|-----------------|------|----|

|                           |        |                                       |        |      |   |
|---------------------------|--------|---------------------------------------|--------|------|---|
| <i>Ruta graveolens</i> L. | Arruda | Pain of ear , pain in the body, colic | Leaves | 0.83 | C |
|---------------------------|--------|---------------------------------------|--------|------|---|

**Sapindaceae**

|                                     |                  |        |             |      |    |
|-------------------------------------|------------------|--------|-------------|------|----|
| <i>Cardiospermum halicacabum</i> L. | Cipó de Vaqueiro | Bruise | Whole Plant | 0.33 | NC |
|-------------------------------------|------------------|--------|-------------|------|----|

|                    |                 |                                               |                  |      |    |
|--------------------|-----------------|-----------------------------------------------|------------------|------|----|
| <i>Cupania</i> sp. | Acabatã do Rêgo | Anti-inflammation, inflammation of the uterus | Bark of the stem | 0.33 | NC |
|--------------------|-----------------|-----------------------------------------------|------------------|------|----|

**Sapotaceae**

|                     |         |                          |                          |      |    |
|---------------------|---------|--------------------------|--------------------------|------|----|
| <i>Pradosia</i> sp. | Burinhê | Tiredness, expectoration | Bark of the stem and oil | 0.33 | NC |
|---------------------|---------|--------------------------|--------------------------|------|----|

**Scrophulariaceae**

|                           |             |        |             |      |    |
|---------------------------|-------------|--------|-------------|------|----|
| <i>Scoparia dulcis</i> L. | Vassourinha | Bruise | Whole Plant | 0.17 | NC |
|---------------------------|-------------|--------|-------------|------|----|

**Smilacaceae**

|                   |           |                   |             |      |    |
|-------------------|-----------|-------------------|-------------|------|----|
| <i>Smilax</i> sp. | Japecanga | Anti-inflammation | Whole Plant | 0.17 | NC |
|-------------------|-----------|-------------------|-------------|------|----|



**Solanaceae**

|                                 |                 |                                                                 |                      |      |    |
|---------------------------------|-----------------|-----------------------------------------------------------------|----------------------|------|----|
| <i>Solanum americanum</i> Mill. | Erva Moura      | Itch                                                            | Leaves and Root      | 0.17 | NC |
| <i>Solanum paniculatum</i> L.   | Jurubeba Branca | Hepatitis, anaemia,<br>spleen, digestive, problem of the kidney | Seed, Root and Fruit | 1.00 | NC |

**Turneraceae**

|                             |         |       |        |      |    |
|-----------------------------|---------|-------|--------|------|----|
| <i>Turnera ulmifolia</i> L. | Chanana | Cough | Flower | 0.17 | NC |
|-----------------------------|---------|-------|--------|------|----|

**Verbenaceae**

|                                       |               |                    |        |      |    |
|---------------------------------------|---------------|--------------------|--------|------|----|
| <i>Lantana camara</i> L.              | Chumbinho     | Cough              | Flower | 0.33 | NC |
| <i>Lippia alba</i> (Mill.) N.E. Br.   | Erva Cidreira | Anaemia, digestive | Leaves | 0.67 | NC |
| <i>Stachytarpheta elatior</i> Schrad. | Mocotó        | Cough, flu         | Root   | 0.67 | NC |
| <i>Vitex agnus-castus</i> L.          | Liamba        | Fever              | Leaves | 0.17 | C  |

**Vitaceae**

|                   |          |          |        |      |   |
|-------------------|----------|----------|--------|------|---|
| <i>Cissus sp.</i> | Insulina | Diabetes | Leaves | 0.17 | C |
|-------------------|----------|----------|--------|------|---|

**Zingiberaceae**

|                                                      |               |                              |                         |      |   |
|------------------------------------------------------|---------------|------------------------------|-------------------------|------|---|
| <i>Alpinia zerumbet</i> (Pers.) Burt. R.<br>M. Smith | Colônia       | Flu, fever, headache, cough  | Leaves, flower and root | 1.67 | C |
| Not identified 01                                    | Caldeiro      | Cough, problem of the kidney | Leaves                  | 0.33 | ? |
| Not identified 02                                    | Cravo branco  | Heart, blood pressure        | Flower                  | 0.33 | ? |
| Not identified 03                                    | Gramineira    | Pain of tooth,               | Latex                   | 0.17 | ? |
| Not identified 04                                    | Imbira Branca | Pain                         | Seed                    | 0.17 | ? |
| Not identified 05                                    | Jaracatiá     | Worm, gastritis              | Latex and Fruit         | 0.33 | ? |
| Not identified 06                                    | Má de Cravo   | Pain, colic                  | Leaves                  | 0.17 | ? |
